# Supplementary material for: Valence-, Dipole- and Quadropole-Bound Electronically Excited States of Closed-Shell Anions Formed by Deprotonation of Cyano- and Ethynyl-Disubstituted Polycyclic Aromatic Hydrocarbons
Source: MDPI journal article supplement (doi:10.3390/chemistry4010004), 2022-01-24
Supplement: s1 [file s1]

# Supplementary Material for: Valence-, Dipole- and Quadropole-Bound Electronically Excited States of Closed-Shell Anions Formed by Deprotonation of Cyano- and Ethynyl-Disubstituted Polycyclic Aromatic Hydrocarbons

Marie E. Strauss<sup>1</sup>, Taylor J. Santaloci<sup>2</sup>, and Ryan C. Fortenberry<sup>2,\*</sup>

<sup>1</sup> Department of Chemistry, Physics, and Engineering, Biola University, La Mirada, CA, United States

<sup>2</sup> Department of Chemistry & Biochemistry, University of Mississippi, University, Mississippi 38677-1848 U.S.A.; r410@olemiss.edu

\* Correspondence: r410@olemiss.edu; Tel.: +1-662-915-1687

Version January 22, 2022 submitted to Chemistry

## Cyanoethynyl- and Diethynylnaphthalene Data

**Table S1.** Relative energies, dipole moment, and quadropole moment of Cyanonethynaphthalene

| 1-Cyanoethynlnaph. | Anion Rel. E.<br>(eV) | Radical Rel. E.<br>(eV) | Dipole (D) | Quad <sup>1</sup> (D-Å) |
|--------------------|-----------------------|-------------------------|------------|-------------------------|
| 0                  | 1.175                 | 0.979                   | 4.37       | 13.14                   |
| 1                  | 1.084                 | 0.888                   | 3.70       | 16.47                   |
| 2                  | 1.392                 | 1.196                   | 5.40       | 14.51                   |
| 3                  | 1.428                 | 1.232                   | 4.92       | 10.88                   |
| 4                  | 1.374                 | 1.178                   | 4.05       | 11.90                   |
| 5                  | 1.261                 | 1.065                   | 3.71       | 16.10                   |
| 6                  | 0.200                 | 0.000                   | 9.98       | 10.88                   |
| 7                  | 0.978                 | 3.072                   | 5.16       | 10.20                   |
| 8                  | 0.968                 | 0.772                   | 3.76       | 11.75                   |
| 9                  | 1.294                 | 3.011                   | 5.42       | 11.22                   |
| 10                 | 1.317                 | 1.121                   | 4.85       | 8.77                    |
| 11                 | 1.307                 | 1.111                   | 3.97       | 12.30                   |
| 12                 | 1.170                 | 0.974                   | 3.74       | 14.00                   |
| 13                 | 0.190                 | 3.521                   | 7.97       | 17.84                   |
| 14                 | 0.986                 | 0.790                   | 5.13       | 12.09                   |
| 15                 | 1.076                 | 3.029                   | 4.30       | 10.11                   |
| 16                 | 1.322                 | 3.003                   | 5.27       | 11.18                   |
| 17                 | 1.396                 | 2.973                   | 4.82       | 8.40                    |
| 18                 | 1.395                 | 2.968                   | 4.01       | 11.51                   |
| 19                 | 1.359                 | 1.162                   | 3.68       | 13.92                   |
| 20                 | 0.000                 | 3.449                   | 3.40       | 24.93                   |
| 21                 | 1.392                 | 3.252                   | 5.39       | 8.92                    |
| 22                 | 1.416                 | 3.235                   | 4.65       | 6.18                    |
| 23                 | 1.312                 | 3.214                   | 3.98       | 8.27                    |
| 24                 | 1.551                 | 3.234                   | 5.02       | 9.48                    |

|    |       |       |       |       |
|----|-------|-------|-------|-------|
| 25 | 1.495 | 3.216 | 4.12  | 9.64  |
| 26 | 1.368 | 1.172 | 3.92  | 11.21 |
| 27 | 0.695 | 3.731 | 10.70 | 12.49 |
| 28 | 1.022 | 0.826 | 5.28  | 11.69 |
| 29 | 2.278 | 0.904 | 5.66  | 18.58 |
| 30 | 1.024 | 0.828 | 3.88  | 13.75 |
| 31 | 1.199 | 1.003 | 5.60  | 12.74 |
| 32 | 1.249 | 1.053 | 4.41  | 13.16 |
| 33 | 1.124 | 2.973 | 3.92  | 13.71 |
| 34 | 0.246 | 3.530 | 9.68  | 10.18 |
| 35 | 0.988 | 0.792 | 4.95  | 10.15 |
| 36 | 2.260 | 0.902 | 5.26  | 17.94 |
| 38 | 1.225 | 1.029 | 5.27  | 13.29 |
| 39 | 1.263 | 1.067 | 4.82  | 10.98 |
| 40 | 1.072 | 0.874 | 3.57  | 12.11 |
| 41 | 0.224 | 0.025 | 6.58  | 30.76 |
| 42 | 1.064 | 3.018 | 4.84  | 9.44  |
| 43 | 1.192 | 2.986 | 4.11  | 9.10  |
| 44 | 1.200 | 2.986 | 3.46  | 13.77 |
| 45 | 1.210 | 3.008 | 5.17  | 13.21 |
| 46 | 1.265 | 2.975 | 4.73  | 10.27 |
| 47 | 1.231 | 3.004 | 3.82  | 11.47 |
| 48 | 0.152 | 3.412 | 2.62  | 32.89 |

---

2-Cyanoethynyl-naph.

|    |       |       |       |       |
|----|-------|-------|-------|-------|
| 0  | 1.029 | 0.128 | 5.83  | 14.10 |
| 1  | 1.006 | 0.089 | 4.94  | 12.16 |
| 2  | 1.313 | 0.085 | 5.37  | 13.09 |
| 3  | 1.313 | 0.064 | 4.45  | 15.86 |
| 4  | 4.677 | 0.064 | 8.02  | 8.33  |
| 5  | 1.171 | 0.075 | 4.80  | 11.85 |
| 6  | 0.062 | 0.586 | 9.80  | 8.64  |
| 7  | 0.878 | 0.113 | 5.77  | 14.30 |
| 8  | 0.984 | 0.110 | 5.07  | 12.63 |
| 9  | 1.103 | 0.073 | 5.66  | 12.13 |
| 10 | 1.193 | 0.069 | 4.67  | 13.28 |
| 11 | 1.187 | 0.063 | 4.21  | 12.46 |
| 12 | 1.113 | 0.071 | 4.90  | 14.61 |
| 13 | 0.204 | 0.644 | 11.14 | 12.01 |
| 14 | 0.786 | 0.093 | 5.73  | 16.08 |
| 15 | 0.924 | 0.132 | 5.90  | 15.01 |
| 16 | 1.068 | 0.039 | 5.54  | 13.72 |
| 17 | 1.203 | 0.028 | 4.55  | 14.36 |
| 18 | 1.205 | 0.018 | 4.13  | 18.48 |
| 19 | 1.244 | 0.047 | 4.78  | 17.83 |
| 20 | 0.041 | 0.521 | 7.20  | 12.74 |
| 21 | 0.997 | 0.077 | 5.83  | 13.03 |
| 22 | 1.016 | 0.072 | 5.90  | 14.02 |
| 23 | 0.981 | 0.019 | 4.92  | 12.11 |
| 24 | 1.073 | 0.047 | 4.70  | 15.13 |
| 25 | 1.056 | 0.009 | 4.14  | 14.54 |

|    |       |       |      |       |
|----|-------|-------|------|-------|
| 26 | 0.974 | 0.019 | 4.75 | 12.59 |
| 27 | 0.057 | 0.479 | 9.62 | 7.09  |
| 28 | 0.793 | 0.058 | 5.39 | 16.62 |
| 29 | 0.930 | 0.060 | 5.53 | 15.43 |
| 30 | 0.936 | 0.011 | 4.52 | 13.59 |
| 31 | 0.925 | 0.048 | 5.22 | 12.71 |
| 32 | 1.043 | 0.037 | 3.76 | 15.97 |
| 33 | 0.979 | 0.003 | 4.40 | 13.71 |
| 34 | 0.077 | 0.542 | 5.83 | 33.79 |
| 35 | 0.796 | 0.050 | 5.24 | 11.66 |
| 36 | 0.945 | 0.055 | 5.42 | 13.96 |
| 38 | 0.959 | 0.000 | 5.13 | 10.77 |
| 39 | 1.061 | 0.036 | 4.07 | 12.10 |
| 40 | 0.937 | 0.039 | 4.23 | 13.21 |
| 41 | 0.000 | 0.536 | 3.09 | 37.43 |
| 42 | 0.834 | 0.068 | 5.39 | 12.85 |
| 43 | 1.035 | 0.066 | 5.69 | 15.57 |
| 44 | 1.130 | 0.032 | 4.79 | 13.89 |
| 45 | 0.946 | 0.021 | 5.29 | 11.39 |
| 46 | 1.069 | 0.015 | 4.34 | 13.91 |
| 47 | 1.042 | 0.036 | 3.89 | 14.90 |
| 48 | 0.047 | 0.463 | 5.94 | 31.52 |

<sup>1</sup>The largest quadrupole component is reported.

**Table S2.** Electronic excited states and electron binding energies of the cyanoethynynaphthalene derivatives

| 1-Cyanoethynynaph. | Excited States     |                    |                   |                   | eBE (eV) |
|--------------------|--------------------|--------------------|-------------------|-------------------|----------|
|                    | 1 <sup>1</sup> A'' | 2 <sup>1</sup> A'' | 2 <sup>1</sup> A' | 3 <sup>1</sup> A' |          |
| 0                  | 2.561              | 2.563              | 2.546             | 2.560             | 2.560    |
| 1                  | 2.641              | 2.643              | 2.630             | 2.641             | 2.638    |
| 2                  | 2.333              | 2.336              | 2.307             | 2.333             | 2.332    |
| 3                  | 2.288              | 2.260              | 2.260             | 2.288             | 2.287    |
| 4                  | 2.351              | 2.353              | 2.332             | 2.350             | 2.349    |
| 5                  | 2.444              | 2.446              | 2.429             | 2.444             | 2.441    |
| 6                  | 3.448              | 3.743              | 3.778             | 3.780             | 3.777    |
| 7                  | 2.814              | 2.816              | 2.805             | 2.814             | 2.814    |
| 8                  | 2.809              | 2.811              | 2.801             | 2.808             | 2.807    |
| 9                  | 2.382              | 2.384              | 2.359             | 2.382             | 2.381    |
| 10                 | 2.388              | 2.390              | 2.364             | 2.387             | 2.387    |
| 11                 | 2.368              | 2.370              | 2.355             | 2.367             | 2.366    |
| 12                 | 2.527              | 2.529              | 2.510             | 2.527             | 2.525    |
| 13                 | 3.592              | 3.695              | 3.727             | 3.729             | 3.726    |
| 14                 | 2.755              | 2.757              | 2.749             | 2.755             | 2.754    |
| 15                 | 2.644              | 2.647              | 2.640             | 2.644             | 2.643    |
| 16                 | 2.356              | 2.358              | 2.346             | 2.355             | 2.354    |
| 17                 | 2.288              | 2.279              | 2.279             | 2.288             | 2.287    |
| 18                 | 2.273              | 2.269              | 2.269             | 2.273             | 2.272    |
| 19                 | 2.288              | 2.282              | 2.282             | 2.288             | 2.287    |
| 20                 | 3.411              | 3.770              | 3.787             | 3.790             | 3.786    |

|    |       |       |       |       |       |
|----|-------|-------|-------|-------|-------|
| 21 | 2.570 | 2.572 | 2.557 | 2.570 | 2.569 |
| 22 | 2.492 | 2.495 | 2.471 | 2.492 | 2.487 |
| 23 | 2.651 | 2.653 | 2.630 | 2.651 | 2.645 |
| 24 | 2.403 | 2.405 | 2.386 | 2.402 | 2.402 |
| 25 | 2.399 | 2.401 | 2.382 | 2.399 | 2.397 |
| 26 | 2.587 | 2.590 | 2.565 | 2.587 | 2.581 |
| 27 | 3.329 | 3.403 | 3.405 | 3.407 | 3.405 |
| 28 | 2.719 | 2.721 | 2.683 | 2.718 | 2.718 |
| 29 | 1.820 | 3.389 | 2.692 | 3.481 | 3.480 |
| 30 | 2.682 | 2.684 | 2.662 | 2.682 | 2.680 |
| 31 | 2.523 | 2.525 | 2.502 | 2.523 | 2.522 |
| 32 | 2.449 | 2.451 | 2.426 | 2.448 | 2.447 |
| 33 | 2.508 | 2.511 | 2.496 | 2.508 | 2.504 |
| 34 | 3.480 | 3.485 | 3.497 | 3.625 | 3.624 |
| 35 | 2.760 | 2.762 | 2.738 | 2.760 | 2.759 |
| 36 | 1.830 | 3.418 | 2.715 | 3.488 | 3.487 |
| 38 | 2.400 | 2.402 | 2.392 | 2.399 | 2.399 |
| 39 | 2.443 | 2.445 | 2.432 | 2.442 | 2.442 |
| 40 | 2.642 | 2.644 | 2.638 | 2.642 | 2.641 |
| 41 | 3.583 | 3.655 | 3.655 | 3.657 | 3.654 |
| 42 | 2.684 | 2.686 | 2.676 | 2.683 | 2.682 |
| 43 | 2.463 | 2.465 | 2.461 | 2.462 | 2.462 |
| 44 | 2.491 | 2.493 | 2.485 | 2.490 | 2.488 |
| 45 | 2.497 | 2.499 | 2.494 | 2.497 | 2.496 |
| 46 | 2.390 | 2.392 | 2.385 | 2.389 | 2.389 |
| 47 | 2.487 | 2.489 | 2.484 | 2.486 | 2.485 |
| 48 | 3.545 | 3.619 | 3.647 | 3.649 | 3.647 |

---

2-Cyanoethynyl-naph.

---

|    |       |       |       |       |       |
|----|-------|-------|-------|-------|-------|
| 0  | 2.635 | 2.637 | 2.627 | 2.634 | 2.634 |
| 1  | 2.629 | 2.631 | 2.621 | 2.628 | 2.628 |
| 2  | 2.289 | 2.272 | 2.272 | 2.288 | 2.287 |
| 3  | 2.294 | 2.278 | 2.278 | 2.294 | 2.293 |
| 4  | 2.286 | 2.286 | 2.272 | 2.272 | 2.286 |
| 5  | 2.437 | 2.439 | 2.418 | 2.436 | 2.436 |
| 6  | 3.572 | 3.633 | 3.761 | 3.762 | 3.760 |
| 7  | 2.773 | 2.775 | 2.757 | 2.773 | 2.772 |
| 8  | 2.653 | 2.656 | 2.647 | 2.653 | 2.652 |
| 9  | 2.527 | 2.529 | 2.491 | 2.526 | 2.526 |
| 10 | 2.431 | 2.433 | 2.390 | 2.430 | 2.429 |
| 11 | 2.445 | 2.447 | 2.409 | 2.444 | 2.443 |
| 12 | 2.507 | 2.509 | 2.461 | 2.506 | 2.504 |
| 13 | 3.565 | 3.664 | 3.668 | 3.670 | 3.667 |
| 14 | 2.914 | 2.916 | 2.905 | 2.914 | 2.914 |
| 15 | 2.777 | 2.779 | 2.771 | 2.776 | 2.776 |
| 16 | 2.538 | 2.540 | 2.519 | 2.537 | 2.537 |
| 17 | 2.379 | 2.381 | 2.363 | 2.378 | 2.378 |
| 18 | 2.401 | 2.403 | 2.386 | 2.400 | 2.400 |
| 19 | 2.308 | 2.288 | 2.288 | 2.307 | 2.305 |
| 20 | 3.597 | 3.660 | 3.730 | 3.732 | 3.730 |
| 21 | 2.628 | 2.630 | 2.619 | 2.627 | 2.627 |

|    |       |       |       |       |       |
|----|-------|-------|-------|-------|-------|
| 22 | 2.612 | 2.614 | 2.605 | 2.612 | 2.611 |
| 23 | 2.556 | 2.559 | 2.550 | 2.556 | 2.555 |
| 24 | 2.533 | 2.535 | 2.517 | 2.532 | 2.532 |
| 25 | 2.507 | 2.509 | 2.489 | 2.507 | 2.504 |
| 26 | 2.612 | 2.614 | 2.583 | 2.612 | 2.611 |
| 27 | 3.479 | 3.540 | 3.178 | 3.178 | 3.652 |
| 28 | 2.852 | 2.855 | 2.843 | 2.852 | 2.852 |
| 29 | 2.704 | 2.706 | 2.696 | 2.703 | 2.703 |
| 30 | 2.587 | 2.589 | 2.584 | 2.587 | 2.586 |
| 31 | 2.698 | 2.700 | 2.678 | 2.697 | 2.697 |
| 32 | 2.574 | 2.576 | 2.559 | 2.574 | 2.566 |
| 33 | 2.528 | 2.530 | 2.516 | 2.527 | 2.526 |
| 34 | 3.590 | 3.696 | 3.600 | 3.697 | 3.696 |
| 35 | 2.830 | 2.832 | 2.829 | 2.830 | 2.829 |
| 36 | 2.673 | 2.675 | 2.672 | 2.672 | 2.671 |
| 38 | 2.570 | 2.572 | 2.557 | 2.569 | 2.568 |
| 39 | 2.521 | 2.523 | 2.510 | 2.521 | 2.519 |
| 40 | 2.653 | 2.655 | 2.644 | 2.653 | 2.652 |
| 41 | 3.509 | 3.677 | 3.737 | 3.739 | 3.735 |
| 42 | 2.811 | 2.813 | 2.806 | 2.810 | 2.810 |
| 43 | 2.590 | 2.592 | 2.588 | 2.589 | 2.588 |
| 44 | 2.386 | 2.388 | 2.383 | 2.386 | 2.385 |
| 45 | 2.672 | 2.674 | 2.650 | 2.672 | 2.671 |
| 46 | 2.476 | 2.479 | 2.463 | 2.476 | 2.475 |
| 47 | 2.589 | 2.591 | 2.565 | 2.588 | 2.587 |
| 48 | 3.592 | 3.642 | 3.669 | 3.672 | 3.669 |

---

**Figure S1.** The dicyanobenzene open shell radical's dipole moment vectors, (A) p-CNCN, (B) m-CNCN (C) o-CNCN

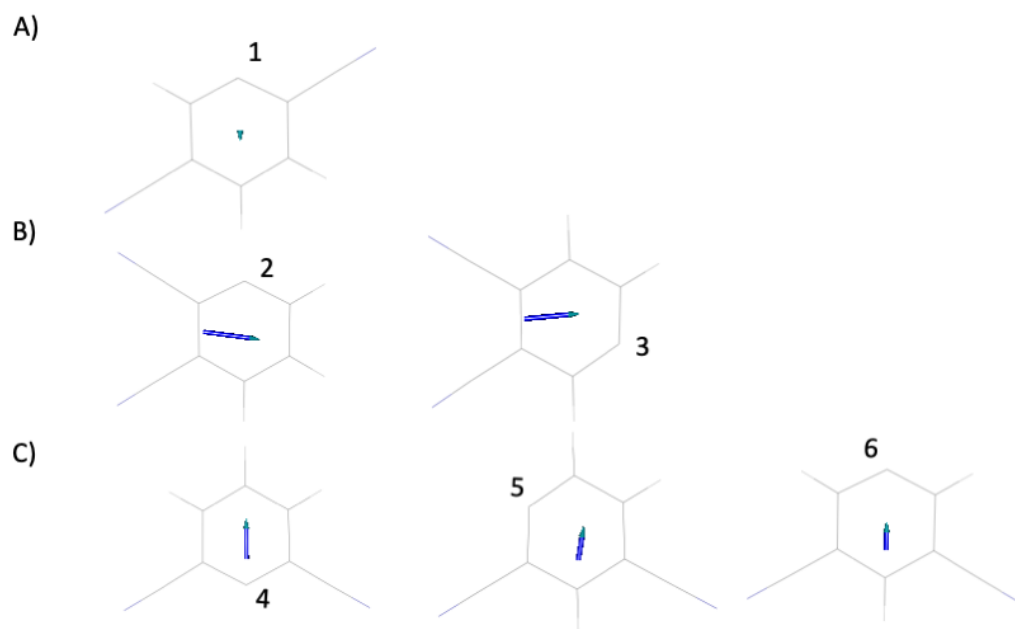

**Figure S2.** The cyanoethynylbenzene open shell radical's dipole moment vectors, (A) p-CNC<sub>2</sub>H, (B) m-CNC<sub>2</sub>H (C) -CNC<sub>2</sub>H

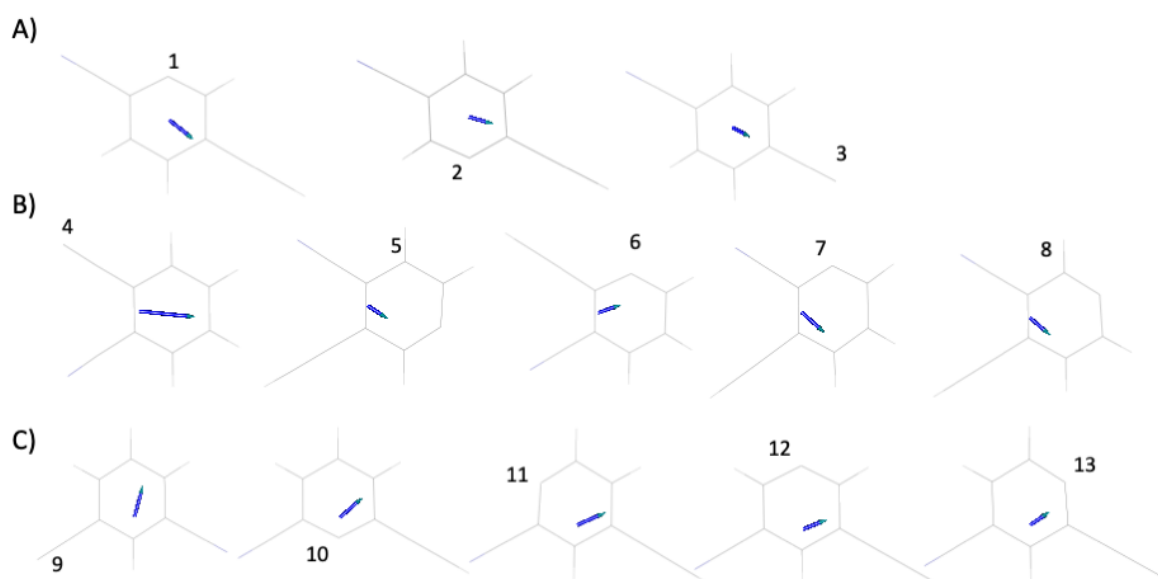

**Figure S3.** The diethynylbenzene open shell radical's dipole moment vectors, (A) p-C<sub>2</sub>HC<sub>2</sub>H, (B) m-C<sub>2</sub>HC<sub>2</sub>H, (C) o-C<sub>2</sub>HC<sub>2</sub>H

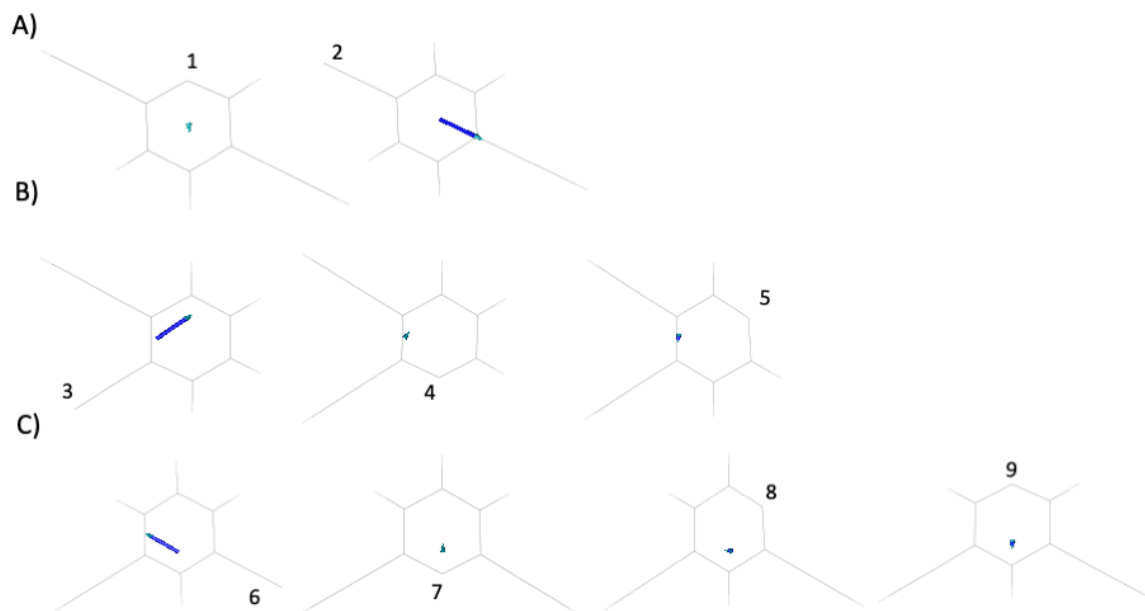

**Table S3.** Relative energies, dipole moment, and quadropole moment of cyanonethynaphthalene

| 1-Diethynlnaph. | Anion Rel. E. (eV) | Radical Rel. E. (eV) | Dipole (D) | Quad <sup>1</sup> (D-Å) |
|-----------------|--------------------|----------------------|------------|-------------------------|
| 0               | 0.135              | 0.428                | 7.05       | 19.13                   |
| 1               | 1.207              | 0.088                | 1.59       | 10.90                   |
| 2               | 1.118              | 0.055                | 0.82       | 11.07                   |
| 3               | 1.413              | 0.064                | 1.47       | 11.67                   |
| 4               | 1.380              | 0.040                | 0.98       | 10.38                   |
| 5               | 1.327              | 0.047                | 0.33       | 9.95                    |
| 6               | 1.243              | 0.053                | 0.68       | 10.84                   |
| 7               | 0.175              | 0.505                | 8.07       | 17.96                   |
| 8               | 0.094              | 0.426                | 7.35       | 16.70                   |
| 9               | 1.111              | 0.095                | 1.89       | 10.46                   |
| 10              | 1.007              | 0.065                | 1.25       | 10.62                   |
| 11              | 1.332              | 0.029                | 1.31       | 10.82                   |
| 12              | 1.285              | 0.006                | 0.66       | 9.70                    |
| 13              | 1.274              | 0.011                | 0.24       | 9.47                    |
| 14              | 1.164              | 0.019                | 1.04       | 10.48                   |
| 15              | 0.131              | 0.490                | 14.82      | 54.94                   |
| 16              | 0.000              | 0.353                | 8.00       | 16.74                   |
| 17              | 1.110              | 0.047                | 1.30       | 10.51                   |
| 19              | 1.358              | 0.021                | 0.83       | 10.86                   |
| 20              | 1.366              | 0.000                | 0.76       | 10.00                   |
| 23              | 0.000              | 0.354                | 8.00       | 16.74                   |
| 24              | 0.577              | 0.673                | 7.44       | 15.18                   |
| 25              | 1.564              | 0.327                | 1.51       | 10.39                   |
| 26              | 1.500              | 0.310                | 1.02       | 10.30                   |

|                  |       |       |       |       |
|------------------|-------|-------|-------|-------|
| 27               | 1.409 | 0.312 | 0.12  | 10.75 |
| 32               | 0.092 | 0.390 | 7.49  | 17.99 |
| 33               | 1.149 | 0.035 | 1.26  | 10.00 |
| 34               | 1.132 | 0.004 | 0.49  | 9.65  |
| 35               | 1.063 | 0.013 | 0.46  | 10.30 |
| 36               | 1.233 | 0.055 | 1.78  | 11.05 |
| 37               | 1.213 | 0.041 | 1.54  | 9.95  |
| 38               | 1.115 | 0.006 | 0.55  | 10.37 |
| 39               | 0.150 | 0.467 | 8.31  | 17.72 |
| 40               | 0.077 | 0.393 | 12.86 | 40.47 |
| 41               | 1.123 | 0.034 | 0.80  | 9.53  |
| 42               | 1.140 | 0.003 | 0.46  | 9.41  |
| 43               | 1.049 | 0.009 | 0.84  | 10.18 |
| 44               | 1.268 | 0.012 | 1.28  | 10.60 |
| 45               | 1.239 | 0.036 | 1.65  | 9.86  |
| 46               | 1.068 | 0.042 | 0.90  | 10.07 |
| 47               | 0.143 | 0.481 | 8.02  | 19.95 |
| 48               | 0.102 | 0.397 | 7.22  | 16.55 |
| 49               | 1.210 | 0.044 | 1.00  | 9.95  |
| 50               | 1.244 | 0.012 | 1.05  | 10.09 |
| 51               | 1.259 | 0.034 | 0.91  | 10.75 |
| 52               | 1.259 | 0.034 | 0.91  | 10.75 |
| 2-Diethynylnaph. |       |       |       |       |
| 8                | 0.190 | 0.553 | 8.11  | 18.53 |
| 9                | 1.057 | 0.108 | 1.52  | 11.12 |
| 11               | 1.148 | 0.078 | 1.40  | 10.91 |
| 12               | 1.222 | 0.068 | 9.21  | 30.00 |
| 32               | 0.054 | 0.481 | 15.67 | 46.03 |
| 33               | 0.981 | 0.048 | 5.61  | 13.73 |
| 35               | 1.026 | 0.005 | 6.02  | 11.78 |
| 37               | 1.084 | 0.044 | 7.65  | 30.12 |
| 40               | 0.000 | 0.448 | 8.39  | 20.89 |
| 41               | 0.981 | 0.039 | 6.01  | 14.05 |
| 42               | 1.096 | 0.036 | 7.64  | 27.64 |
| 43               | 1.017 | 0.000 | 5.55  | 11.42 |

<sup>1</sup>The largest quadrupole component is reported.

**Table S4.** Electronic excited states and electron binding energies of the cyanoethynylnaphthalene derivatives

| 1-Diethynylnaph. | Excited States     |                    |                   |                   | eBE (eV) |
|------------------|--------------------|--------------------|-------------------|-------------------|----------|
|                  | 1 <sup>1</sup> A'' | 2 <sup>1</sup> A'' | 2 <sup>1</sup> A' | 3 <sup>1</sup> A' |          |
| 0                | 3.282              | 3.336              | 3.336             | 3.338             | 3.336    |
| 1                | 2.208              | 2.207              | 2.207             | 2.208             | 2.207    |
| 2                | 2.279              | 2.279              | 2.279             | 2.280             | 2.279    |
| 3                | 1.964              | 1.966              | 1.964             | 1.964             | 1.965    |
| 4                | 2.006              | 2.008              | 2.005             | 2.006             | 2.006    |
| 5                | 2.083              | 2.085              | 2.082             | 2.083             | 2.083    |
| 6                | 2.143              | 2.145              | 2.142             | 2.143             | 2.143    |
| 7                | 3.321              | 3.357              | 3.358             | 3.360             | 3.357    |



|                  |       |       |       |       |       |
|------------------|-------|-------|-------|-------|-------|
| 8                | 3.363 | 3.396 | 3.397 | 3.399 | 3.396 |
| 9                | 2.344 | 2.346 | 2.343 | 2.344 | 2.344 |
| 10               | 2.449 | 2.452 | 2.449 | 2.450 | 2.450 |
| 11               | 2.005 | 2.007 | 2.004 | 2.005 | 2.005 |
| 12               | 2.094 | 2.096 | 2.093 | 2.094 | 2.094 |
| 13               | 2.088 | 2.090 | 2.087 | 2.088 | 2.088 |
| 14               | 2.216 | 2.215 | 2.215 | 2.216 | 2.217 |
| 15               | 3.378 | 3.417 | 3.417 | 3.419 | 3.417 |
| 16               | 3.344 | 3.380 | 3.381 | 3.383 | 3.380 |
| 17               | 2.285 | 2.284 | 2.284 | 2.286 | 2.285 |
| 19               | 1.977 | 1.979 | 1.976 | 1.977 | 1.977 |
| 20               | 1.991 | 1.994 | 1.991 | 1.993 | 1.992 |
| 24               | 3.054 | 3.124 | 3.125 | 3.125 | 3.124 |
| 25               | 2.042 | 2.045 | 2.042 | 2.043 | 2.043 |
| 26               | 2.139 | 2.141 | 2.138 | 2.140 | 2.138 |
| 27               | 2.292 | 2.291 | 2.291 | 2.292 | 2.293 |
| 32               | 3.278 | 3.355 | 3.356 | 3.358 | 3.356 |
| 33               | 2.248 | 2.247 | 2.247 | 2.248 | 2.248 |
| 34               | 2.211 | 2.210 | 2.210 | 2.211 | 2.211 |
| 35               | 2.316 | 2.318 | 2.315 | 2.316 | 2.316 |
| 36               | 2.153 | 2.155 | 2.152 | 2.153 | 2.153 |
| 37               | 2.174 | 2.176 | 2.174 | 2.175 | 2.175 |
| 38               | 2.196 | 2.198 | 2.195 | 2.197 | 2.529 |
| 39               | 3.283 | 3.345 | 3.346 | 3.348 | 3.345 |
| 55               | 3.349 | 3.387 | 3.387 | 3.389 | 3.387 |
| 41               | 2.291 | 2.290 | 2.290 | 2.291 | 2.291 |
| 42               | 2.189 | 2.191 | 2.189 | 2.191 | 2.189 |
| 43               | 2.354 | 2.356 | 2.353 | 2.354 | 2.354 |
| 44               | 2.023 | 2.025 | 2.022 | 2.023 | 2.022 |
| 45               | 2.150 | 2.152 | 2.149 | 2.150 | 2.150 |
| 46               | 2.337 | 2.339 | 2.336 | 2.337 | 2.337 |
| 47               | 3.349 | 3.387 | 3.388 | 3.390 | 3.387 |
| 48               | 3.323 | 3.356 | 3.357 | 3.359 | 3.356 |
| 49               | 2.208 | 2.208 | 2.208 | 2.209 | 2.209 |
| 50               | 2.098 | 2.100 | 2.098 | 2.099 | 2.098 |
| 51               | 2.121 | 2.123 | 2.121 | 2.122 | 2.121 |
| 52               | 2.121 | 2.124 | 2.121 | 2.122 | 2.121 |
| 2-Diethynylnaph. |       |       |       |       |       |
| 8                | 3.307 | 3.340 | 3.341 | 3.343 | 3.340 |
| 9                | 2.308 | 2.310 | 2.307 | 2.308 | 2.308 |
| 11               | 2.213 | 2.211 | 2.211 | 2.213 | 2.214 |
| 12               | 2.151 | 2.153 | 2.150 | 2.151 | 2.150 |
| 32               | 3.397 | 3.422 | 3.423 | 3.424 | 3.422 |
| 33               | 2.382 | 2.384 | 2.381 | 2.382 | 2.381 |
| 35               | 2.226 | 2.225 | 2.225 | 2.226 | 2.225 |
| 37               | 2.269 | 2.268 | 2.268 | 2.270 | 2.268 |
| 40               | 3.384 | 3.421 | 3.422 | 3.424 | 3.421 |
| 41               | 2.356 | 2.358 | 2.355 | 2.356 | 2.355 |
| 42               | 2.233 | 2.233 | 2.233 | 2.234 | 2.233 |
| 43               | 2.248 | 2.247 | 2.247 | 2.248 | 2.247 |

**Figure S4.** The optimized structure of cyanoethynynaphthalene with numbered positions of deprotonation., (A) 1-cyanoethynynaphthalene, (B) 2-cyanoethynynaphthalene

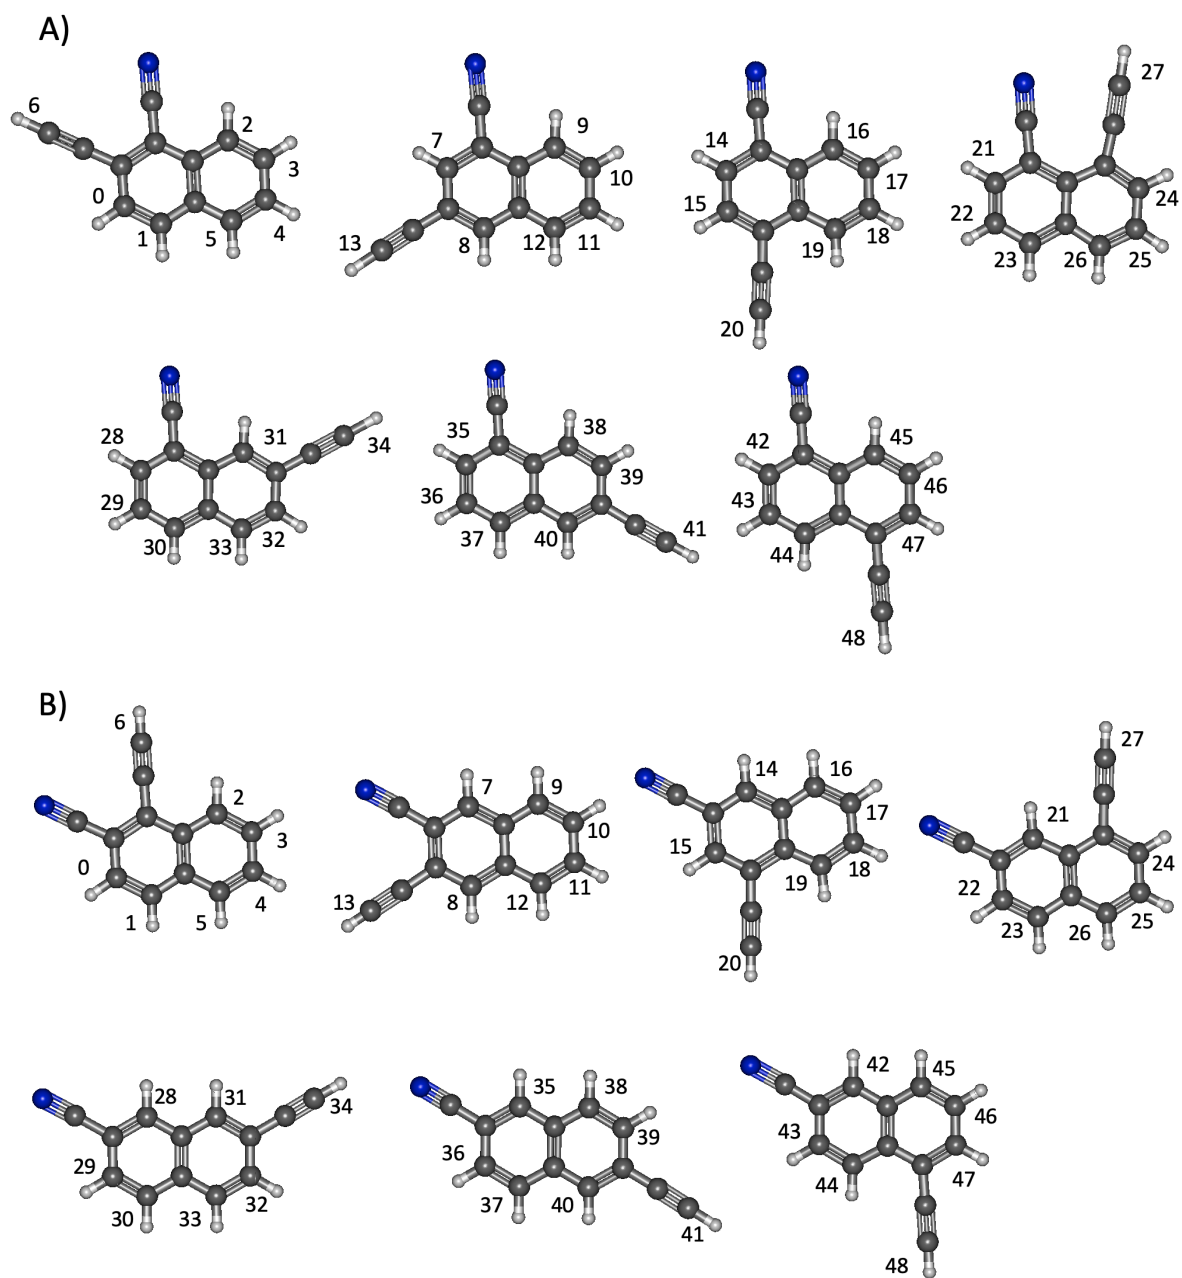

**Figure S5.** The optimized structure of diethylnaphthalene with numbered positions of deprotonation(A) 1-diethylnaphthalene, (B) 2-diethylnaphthalene.

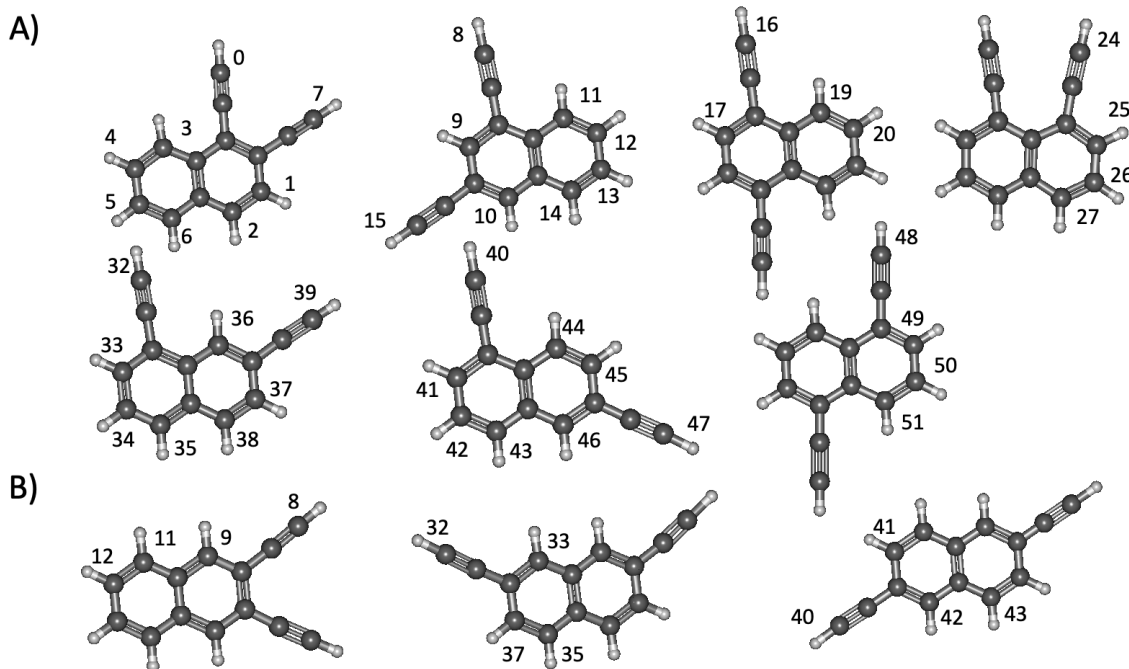

**Table S5.** Oscillator strengths of the examined molecules

| Dicyanobenz.      | 1 $^1A''$              | 2 $^1A''$              | 2 $^1A'$               | 3 $^1A'$               |
|-------------------|------------------------|------------------------|------------------------|------------------------|
| p-CNCN-1          | $6.36 \times 10^{-04}$ | $< 1 \times 10^{-06}$  | $6.81 \times 10^{-04}$ | $5.42 \times 10^{-04}$ |
| o-CNCN-2          | $2.01 \times 10^{-04}$ | $6.80 \times 10^{-06}$ | $5.29 \times 10^{-03}$ | $9.66 \times 10^{-05}$ |
| o-CNCN-3          | $1.61 \times 10^{-03}$ | $2.70 \times 10^{-07}$ | $1.18 \times 10^{-02}$ | $2.97 \times 10^{-04}$ |
| m-CNCN-4          | $2.20 \times 10^{-06}$ | $3.81 \times 10^{-05}$ | $2.68 \times 10^{-03}$ | $2.68 \times 10^{-03}$ |
| m-CNCN-5          | $2.97 \times 10^{-03}$ | $3.45 \times 10^{-05}$ | $7.48 \times 10^{-03}$ | $9.39 \times 10^{-05}$ |
| m-CNCN-6          | $5.40 \times 10^{-07}$ | $1.48 \times 10^{-04}$ | $7.78 \times 10^{-03}$ | $2.36 \times 10^{-04}$ |
| Cyanoethynylbenz. |                        |                        |                        |                        |
| p-CNC2H-1         | $8.33 \times 10^{-04}$ | $< 1 \times 10^{-06}$  | $1.45 \times 10^{-04}$ | $2.44 \times 10^{-05}$ |
| p-CNC2H-2         | $8.35 \times 10^{-04}$ | $5.00 \times 10^{-07}$ | $2.71 \times 10^{-04}$ | $5.69 \times 10^{-05}$ |
| p-CNC2H-3         | $3.75 \times 10^{-04}$ | $3.98 \times 10^{-06}$ | $5.51 \times 10^{-01}$ | $7.61 \times 10^{-03}$ |
| o-CNC2H-4         | $2.33 \times 10^{-03}$ | $5.18 \times 10^{-05}$ | $1.69 \times 10^{-04}$ | $1.49 \times 10^{-01}$ |
| o-CNC2H-5         | $2.56 \times 10^{-04}$ | $9.00 \times 10^{-08}$ | $2.58 \times 10^{-03}$ | $9.84 \times 10^{-05}$ |
| o-CNC2H-6         | $3.00 \times 10^{-08}$ | $6.16 \times 10^{-05}$ | $3.52 \times 10^{-03}$ | $2.63 \times 10^{-04}$ |
| o-CNC2H-7         | $1.00 \times 10^{-07}$ | $4.69 \times 10^{-05}$ | $3.59 \times 10^{-03}$ | $1.38 \times 10^{-04}$ |
| o-CNC2H-8         | $1.89 \times 10^{-04}$ | $3.75 \times 10^{-06}$ | $1.88 \times 10^{-03}$ | $1.75 \times 10^{-05}$ |
| m-CNC2H-9         | $1.39 \times 10^{-03}$ | $4.13 \times 10^{-06}$ | $6.52 \times 10^{-02}$ | $4.70 \times 10^{-05}$ |
| m-CNC2H-10        | $1.76 \times 10^{-05}$ | $1.20 \times 10^{-06}$ | $8.35 \times 10^{-04}$ | $5.86 \times 10^{-06}$ |
| m-CNC2H-11        | $< 1 \times 10^{-06}$  | $5.45 \times 10^{-05}$ | $1.98 \times 10^{-03}$ | $1.68 \times 10^{-04}$ |
| m-CNC2H-12        | $2.66 \times 10^{-05}$ | $< 1 \times 10^{-06}$  | $1.03 \times 10^{-03}$ | $1.30 \times 10^{-04}$ |
| m-CNC2H-13        | $1.76 \times 10^{-06}$ | $4.82 \times 10^{-06}$ | $1.73 \times 10^{-03}$ | $2.61 \times 10^{-05}$ |
| Diethynylbenz.    |                        |                        |                        |                        |
| p-C2HC2H-1        | $4.00 \times 10^{-08}$ | $5.03 \times 10^{-05}$ | $1.75 \times 10^{-06}$ | $3.64 \times 10^{-05}$ |
| p-C2HC2H-2        | $1.32 \times 10^{-06}$ | $1.59 \times 10^{-05}$ | $6.23 \times 10^{-05}$ | $1.81 \times 10^{-03}$ |

|                      |                        |                        |                        |                        |
|----------------------|------------------------|------------------------|------------------------|------------------------|
| o-C2HC2H-3           | $1.85 \times 10^{-03}$ | $1.70 \times 10^{-05}$ | $6.10 \times 10^{-07}$ | $1.91 \times 10^{-05}$ |
| o-C2HC2H-4           | $7.00 \times 10^{-08}$ | $2.67 \times 10^{-05}$ | $1.01 \times 10^{-05}$ | $1.12 \times 10^{-04}$ |
| o-C2HC2H-5           | $4.60 \times 10^{-07}$ | $3.11 \times 10^{-05}$ | $4.15 \times 10^{-06}$ | $1.30 \times 10^{-04}$ |
| m-C2HC2H-6           | $5.79 \times 10^{-04}$ | $5.95 \times 10^{-06}$ | $4.60 \times 10^{-07}$ | $1.34 \times 10^{-05}$ |
| m-C2HC2H-7           | $9.00 \times 10^{-08}$ | $1.51 \times 10^{-05}$ | $6.30 \times 10^{-07}$ | $6.31 \times 10^{-05}$ |
| m-C2HC2H-8           | $9.00 \times 10^{-08}$ | $1.14 \times 10^{-05}$ | $6.50 \times 10^{-07}$ | $1.10 \times 10^{-04}$ |
| m-C2HC2H-9           | $2.80 \times 10^{-07}$ | $4.43 \times 10^{-05}$ | $2.10 \times 10^{-07}$ | $5.07 \times 10^{-05}$ |
| 1-Dicyanonaph.       |                        |                        |                        |                        |
| 0                    | $6.00 \times 10^{-08}$ | $1.20 \times 10^{-07}$ | $1.93 \times 10^{-03}$ | $3.75 \times 10^{-06}$ |
| 1                    | $4.00 \times 10^{-08}$ | $1.00 \times 10^{-07}$ | $2.22 \times 10^{-03}$ | $4.14 \times 10^{-05}$ |
| 2                    | $4.00 \times 10^{-08}$ | $1.50 \times 10^{-07}$ | $7.72 \times 10^{-04}$ | $4.01 \times 10^{-06}$ |
| 3                    | $2.50 \times 10^{-07}$ | $4.70 \times 10^{-07}$ | $7.30 \times 10^{-03}$ | $1.85 \times 10^{-04}$ |
| 4                    | $3.00 \times 10^{-08}$ | $5.00 \times 10^{-08}$ | $4.80 \times 10^{-03}$ | $1.08 \times 10^{-04}$ |
| 24                   | $2.05 \times 10^{-03}$ | $5.40 \times 10^{-07}$ | $6.52 \times 10^{-03}$ | $1.47 \times 10^{-04}$ |
| 25                   | $1.61 \times 10^{-03}$ | $1.70 \times 10^{-07}$ | $1.26 \times 10^{-02}$ | $3.26 \times 10^{-04}$ |
| 26                   | $3.00 \times 10^{-08}$ | $2.00 \times 10^{-08}$ | $8.39 \times 10^{-03}$ | $1.09 \times 10^{-04}$ |
| 27                   | $0.00 \times 10^{+00}$ | $6.00 \times 10^{-08}$ | $4.72 \times 10^{-04}$ | $3.45 \times 10^{-06}$ |
| 28                   | $1.00 \times 10^{-08}$ | $1.00 \times 10^{-08}$ | $2.60 \times 10^{-03}$ | $1.75 \times 10^{-05}$ |
| 29                   | $3.00 \times 10^{-08}$ | $6.00 \times 10^{-08}$ | $2.94 \times 10^{-03}$ | $4.93 \times 10^{-05}$ |
| 30                   | $1.00 \times 10^{-07}$ | $3.30 \times 10^{-07}$ | $6.62 \times 10^{-03}$ | $1.97 \times 10^{-05}$ |
| 31                   | $< 1 \times 10^{-06}$  | $1.00 \times 10^{-08}$ | $8.58 \times 10^{-03}$ | $6.49 \times 10^{-05}$ |
| 33                   | $2.00 \times 10^{-08}$ | $3.20 \times 10^{-07}$ | $4.80 \times 10^{-04}$ | $4.30 \times 10^{-07}$ |
| 34                   | $3.00 \times 10^{-08}$ | $6.00 \times 10^{-08}$ | $9.58 \times 10^{-04}$ | $2.40 \times 10^{-07}$ |
| 35                   | $3.00 \times 10^{-08}$ | $4.50 \times 10^{-07}$ | $3.41 \times 10^{-03}$ | $3.41 \times 10^{-03}$ |
| 36                   | $2.00 \times 10^{-07}$ | $1.45 \times 10^{-06}$ | $9.74 \times 10^{-04}$ | $6.43 \times 10^{-04}$ |
| 38                   | $2.40 \times 10^{-07}$ | $1.73 \times 10^{-06}$ | $3.60 \times 10^{-04}$ | $7.80 \times 10^{-06}$ |
| 40                   | $3.80 \times 10^{-07}$ | $2.56 \times 10^{-06}$ | $2.38 \times 10^{-06}$ | $5.26 \times 10^{-04}$ |
| 2-Dicyanonaph.       |                        |                        |                        |                        |
| 7                    | $1.00 \times 10^{-08}$ | $0.00 \times 10^{+00}$ | $2.86 \times 10^{-04}$ | $2.86 \times 10^{-04}$ |
| 8                    | $4.00 \times 10^{-08}$ | $8.00 \times 10^{-08}$ | $2.25 \times 10^{-03}$ | $2.36 \times 10^{-05}$ |
| 9                    | $3.80 \times 10^{-07}$ | $1.02 \times 10^{-06}$ | $1.05 \times 10^{-02}$ | $1.91 \times 10^{-04}$ |
| 25                   | $4.00 \times 10^{-08}$ | $9.00 \times 10^{-08}$ | $5.06 \times 10^{-03}$ | $1.17 \times 10^{-05}$ |
| 26                   | $3.00 \times 10^{-08}$ | $2.00 \times 10^{-08}$ | $3.21 \times 10^{-03}$ | $2.38 \times 10^{-05}$ |
| 27                   | $5.00 \times 10^{-08}$ | $4.70 \times 10^{-07}$ | $4.19 \times 10^{-04}$ | $4.19 \times 10^{-04}$ |
| 32                   | $2.90 \times 10^{-07}$ | $2.44 \times 10^{-06}$ | $2.73 \times 10^{-04}$ | $2.42 \times 10^{-06}$ |
| 34                   | $2.20 \times 10^{-07}$ | $1.67 \times 10^{-06}$ | $4.98 \times 10^{-03}$ | $5.94 \times 10^{-06}$ |
| 35                   | $3.00 \times 10^{-08}$ | $6.20 \times 10^{-07}$ | $9.15 \times 10^{-04}$ | $9.15 \times 10^{-04}$ |
| 1-Cyanoethynyl naph. |                        |                        |                        |                        |
| 0                    | $1.10 \times 10^{-07}$ | $9.60 \times 10^{-07}$ | $1.63 \times 10^{-03}$ | $1.84 \times 10^{-05}$ |
| 1                    | $1.40 \times 10^{-07}$ | $1.54 \times 10^{-06}$ | $2.51 \times 10^{-03}$ | $6.45 \times 10^{-05}$ |
| 2                    | $4.00 \times 10^{-08}$ | $4.00 \times 10^{-08}$ | $6.36 \times 10^{-04}$ | $1.30 \times 10^{-07}$ |
| 3                    | $7.00 \times 10^{-08}$ | $3.05 \times 10^{-03}$ | $3.05 \times 10^{-03}$ | $1.19 \times 10^{-05}$ |
| 4                    | $1.70 \times 10^{-07}$ | $1.39 \times 10^{-06}$ | $4.26 \times 10^{-03}$ | $6.98 \times 10^{-05}$ |
| 5                    | $4.80 \times 10^{-07}$ | $3.76 \times 10^{-06}$ | $3.87 \times 10^{-03}$ | $1.05 \times 10^{-04}$ |
| 6                    | $1.83 \times 10^{-04}$ | $6.19 \times 10^{-06}$ | $< 1 \times 10^{-06}$  | $3.00 \times 10^{-08}$ |
| 7                    | $5.00 \times 10^{-08}$ | $1.50 \times 10^{-07}$ | $5.61 \times 10^{-04}$ | $1.00 \times 10^{-08}$ |
| 8                    | $6.00 \times 10^{-08}$ | $6.10 \times 10^{-07}$ | $1.14 \times 10^{-03}$ | $1.42 \times 10^{-05}$ |
| 9                    | $8.00 \times 10^{-08}$ | $1.70 \times 10^{-07}$ | $7.11 \times 10^{-04}$ | $3.30 \times 10^{-07}$ |
| 10                   | $6.00 \times 10^{-08}$ | $1.10 \times 10^{-07}$ | $3.53 \times 10^{-03}$ | $1.89 \times 10^{-05}$ |
| 11                   | $1.80 \times 10^{-07}$ | $1.44 \times 10^{-06}$ | $3.40 \times 10^{-03}$ | $8.49 \times 10^{-05}$ |

|    |                        |                        |                        |                        |
|----|------------------------|------------------------|------------------------|------------------------|
| 12 | $5.00 \times 10^{-08}$ | $5.90 \times 10^{-07}$ | $3.23 \times 10^{-03}$ | $3.39 \times 10^{-05}$ |
| 13 | $1.91 \times 10^{-04}$ | $1.34 \times 10^{-05}$ | $< 1 \times 10^{-06}$  | $3.00 \times 10^{-08}$ |
| 14 | $2.00 \times 10^{-08}$ | $3.00 \times 10^{-08}$ | $2.43 \times 10^{-04}$ | $< 1 \times 10^{-06}$  |
| 15 | $< 1 \times 10^{-06}$  | $2.00 \times 10^{-08}$ | $3.76 \times 10^{-04}$ | $5.00 \times 10^{-06}$ |
| 16 | $1.40 \times 10^{-07}$ | $1.15 \times 10^{-06}$ | $5.30 \times 10^{-04}$ | $2.29 \times 10^{-06}$ |
| 17 | $2.30 \times 10^{-07}$ | $1.24 \times 10^{-03}$ | $1.24 \times 10^{-03}$ | $2.17 \times 10^{-05}$ |
| 18 | $3.00 \times 10^{-08}$ | $1.28 \times 10^{-03}$ | $1.28 \times 10^{-03}$ | $1.47 \times 10^{-04}$ |
| 19 | $1.50 \times 10^{-07}$ | $7.97 \times 10^{-04}$ | $7.97 \times 10^{-04}$ | $1.71 \times 10^{-05}$ |
| 20 | $6.43 \times 10^{-05}$ | $4.32 \times 10^{-04}$ | $1.00 \times 10^{-08}$ | $4.50 \times 10^{-07}$ |
| 21 | $7.00 \times 10^{-08}$ | $2.60 \times 10^{-07}$ | $1.07 \times 10^{-03}$ | $1.72 \times 10^{-06}$ |
| 22 | $2.60 \times 10^{-07}$ | $2.18 \times 10^{-06}$ | $3.75 \times 10^{-03}$ | $6.11 \times 10^{-05}$ |
| 23 | $8.00 \times 10^{-08}$ | $1.12 \times 10^{-06}$ | $5.58 \times 10^{-03}$ | $1.78 \times 10^{-04}$ |
| 24 | $2.00 \times 10^{-08}$ | $5.00 \times 10^{-08}$ | $1.46 \times 10^{-03}$ | $6.85 \times 10^{-06}$ |
| 25 | $1.00 \times 10^{-07}$ | $8.90 \times 10^{-07}$ | $3.61 \times 10^{-03}$ | $1.03 \times 10^{-04}$ |
| 26 | $1.10 \times 10^{-07}$ | $1.04 \times 10^{-06}$ | $5.66 \times 10^{-03}$ | $1.49 \times 10^{-04}$ |
| 27 | $6.68 \times 10^{-04}$ | $5.24 \times 10^{-06}$ | $< 1 \times 10^{-06}$  | $< 1 \times 10^{-06}$  |
| 28 | $4.00 \times 10^{-08}$ | $6.00 \times 10^{-08}$ | $2.94 \times 10^{-03}$ | $4.94 \times 10^{-06}$ |
| 29 | $3.63 \times 10^{-03}$ | $6.61 \times 10^{-05}$ | $5.30 \times 10^{-02}$ | $1.00 \times 10^{-08}$ |
| 30 | $3.00 \times 10^{-07}$ | $2.55 \times 10^{-06}$ | $5.53 \times 10^{-03}$ | $7.13 \times 10^{-05}$ |
| 31 | $7.00 \times 10^{-08}$ | $1.40 \times 10^{-07}$ | $3.75 \times 10^{-04}$ | $1.67 \times 10^{-06}$ |
| 32 | $1.60 \times 10^{-07}$ | $1.32 \times 10^{-06}$ | $2.18 \times 10^{-03}$ | $1.93 \times 10^{-05}$ |
| 33 | $1.40 \times 10^{-07}$ | $1.73 \times 10^{-06}$ | $2.78 \times 10^{-03}$ | $8.34 \times 10^{-05}$ |
| 34 | $< 1 \times 10^{-06}$  | $< 1 \times 10^{-06}$  | $2.27 \times 10^{-01}$ | $1.80 \times 10^{-07}$ |
| 35 | $7.00 \times 10^{-08}$ | $1.70 \times 10^{-07}$ | $2.82 \times 10^{-03}$ | $3.36 \times 10^{-06}$ |
| 36 | $3.78 \times 10^{-03}$ | $1.78 \times 10^{-03}$ | $5.03 \times 10^{-02}$ | $1.00 \times 10^{-08}$ |
| 38 | $3.00 \times 10^{-08}$ | $2.00 \times 10^{-08}$ | $1.60 \times 10^{-04}$ | $7.70 \times 10^{-07}$ |
| 39 | $5.00 \times 10^{-08}$ | $9.00 \times 10^{-08}$ | $8.42 \times 10^{-04}$ | $3.30 \times 10^{-07}$ |
| 40 | $5.00 \times 10^{-08}$ | $1.20 \times 10^{-07}$ | $5.75 \times 10^{-04}$ | $1.52 \times 10^{-05}$ |
| 41 | $1.44 \times 10^{-04}$ | $2.00 \times 10^{-08}$ | $< 1 \times 10^{-06}$  | $1.60 \times 10^{-07}$ |
| 42 | $1.80 \times 10^{-07}$ | $1.31 \times 10^{-06}$ | $8.58 \times 10^{-04}$ | $7.09 \times 10^{-06}$ |
| 43 | $1.60 \times 10^{-07}$ | $6.10 \times 10^{-07}$ | $4.05 \times 10^{-04}$ | $2.91 \times 10^{-05}$ |
| 44 | $1.50 \times 10^{-07}$ | $1.30 \times 10^{-06}$ | $8.97 \times 10^{-04}$ | $2.25 \times 10^{-05}$ |
| 45 | $1.30 \times 10^{-07}$ | $4.30 \times 10^{-07}$ | $1.77 \times 10^{-04}$ | $9.00 \times 10^{-08}$ |
| 46 | $6.00 \times 10^{-08}$ | $1.40 \times 10^{-07}$ | $2.77 \times 10^{-04}$ | $1.00 \times 10^{-08}$ |
| 47 | $1.00 \times 10^{-07}$ | $8.40 \times 10^{-07}$ | $5.67 \times 10^{-04}$ | $3.90 \times 10^{-05}$ |
| 48 | $5.47 \times 10^{-05}$ | $1.88 \times 10^{-03}$ | $0.00 \times 10^{+00}$ | $1.00 \times 10^{-08}$ |

---

2-Cyanoethynyl-naph.

---

|    |                        |                        |                         |                        |
|----|------------------------|------------------------|-------------------------|------------------------|
| 0  | $9.00 \times 10^{-08}$ | $2.80 \times 10^{-07}$ | $4.04 \times 10^{-04}$  | $5.80 \times 10^{-07}$ |
| 1  | $1.20 \times 10^{-07}$ | $3.80 \times 10^{-07}$ | $7.15 \times 10^{-04}$  | $4.28 \times 10^{-06}$ |
| 2  | $3.50 \times 10^{-07}$ | $6.23 \times 10^{-04}$ | $6.23 \times 10^{-04}$  | $1.49 \times 10^{-06}$ |
| 3  | $1.00 \times 10^{-08}$ | $3.05 \times 10^{-03}$ | $3.05 \times 10^{-03}$  | $5.63 \times 10^{-05}$ |
| 4  | $4.00 \times 10^{-08}$ | $4.00 \times 10^{-08}$ | $-4.10 \times 10^{-06}$ | $9.20 \times 10^{-07}$ |
| 5  | $3.00 \times 10^{-08}$ | $4.00 \times 10^{-08}$ | $2.20 \times 10^{-03}$  | $2.80 \times 10^{-05}$ |
| 6  | $3.85 \times 10^{-04}$ | $1.44 \times 10^{-03}$ | $< 1 \times 10^{-06}$   | $6.00 \times 10^{-08}$ |
| 7  | $3.00 \times 10^{-08}$ | $1.00 \times 10^{-08}$ | $1.42 \times 10^{-04}$  | $1.70 \times 10^{-07}$ |
| 8  | $2.00 \times 10^{-08}$ | $4.00 \times 10^{-08}$ | $1.73 \times 10^{-04}$  | $1.40 \times 10^{-06}$ |
| 9  | $8.00 \times 10^{-08}$ | $2.10 \times 10^{-07}$ | $1.41 \times 10^{-03}$  | $4.11 \times 10^{-06}$ |
| 10 | $1.90 \times 10^{-07}$ | $1.74 \times 10^{-06}$ | $7.28 \times 10^{-03}$  | $1.37 \times 10^{-04}$ |
| 11 | $8.00 \times 10^{-08}$ | $8.60 \times 10^{-07}$ | $8.16 \times 10^{-03}$  | $2.14 \times 10^{-04}$ |
| 12 | $< 1 \times 10^{-06}$  | $1.40 \times 10^{-07}$ | $2.97 \times 10^{-03}$  | $2.99 \times 10^{-05}$ |

|    |                        |                        |                        |                        |
|----|------------------------|------------------------|------------------------|------------------------|
| 13 | $9.32 \times 10^{-06}$ | $1.22 \times 10^{-06}$ | $1.00 \times 10^{-08}$ | $3.60 \times 10^{-07}$ |
| 14 | $3.00 \times 10^{-08}$ | $5.00 \times 10^{-08}$ | $4.43 \times 10^{-04}$ | $2.10 \times 10^{-07}$ |
| 15 | $2.00 \times 10^{-08}$ | $2.10 \times 10^{-07}$ | $2.33 \times 10^{-04}$ | $9.00 \times 10^{-07}$ |
| 16 | $1.30 \times 10^{-07}$ | $4.30 \times 10^{-07}$ | $1.25 \times 10^{-03}$ | $6.98 \times 10^{-06}$ |
| 17 | $1.20 \times 10^{-07}$ | $3.80 \times 10^{-07}$ | $2.61 \times 10^{-03}$ | $4.71 \times 10^{-05}$ |
| 18 | $< 1 \times 10^{-06}$  | $< 1 \times 10^{-06}$  | $3.67 \times 10^{-03}$ | $8.85 \times 10^{-05}$ |
| 19 | $4.20 \times 10^{-07}$ | $1.27 \times 10^{-03}$ | $1.27 \times 10^{-03}$ | $9.31 \times 10^{-06}$ |
| 20 | $9.34 \times 10^{-05}$ | $8.01 \times 10^{-04}$ | $< 1 \times 10^{-06}$  | $2.00 \times 10^{-08}$ |
| 21 | $3.00 \times 10^{-08}$ | $3.00 \times 10^{-07}$ | $1.78 \times 10^{-04}$ | $4.00 \times 10^{-07}$ |
| 22 | $1.60 \times 10^{-07}$ | $6.30 \times 10^{-07}$ | $5.90 \times 10^{-04}$ | $4.80 \times 10^{-07}$ |
| 23 | $1.10 \times 10^{-07}$ | $3.30 \times 10^{-07}$ | $7.30 \times 10^{-04}$ | $5.70 \times 10^{-06}$ |
| 24 | $9.00 \times 10^{-08}$ | $3.40 \times 10^{-07}$ | $2.08 \times 10^{-03}$ | $4.08 \times 10^{-05}$ |
| 25 | $4.00 \times 10^{-08}$ | $8.00 \times 10^{-08}$ | $3.95 \times 10^{-03}$ | $8.80 \times 10^{-05}$ |
| 26 | $2.00 \times 10^{-08}$ | $3.40 \times 10^{-07}$ | $4.98 \times 10^{-03}$ | $6.45 \times 10^{-05}$ |
| 27 | $8.94 \times 10^{-04}$ | $1.68 \times 10^{-06}$ | $2.10 \times 10^{-01}$ | $2.10 \times 10^{-01}$ |
| 28 | $2.00 \times 10^{-08}$ | $2.00 \times 10^{-08}$ | $1.78 \times 10^{-04}$ | $3.40 \times 10^{-07}$ |
| 29 | $7.00 \times 10^{-08}$ | $1.60 \times 10^{-07}$ | $1.26 \times 10^{-03}$ | $2.20 \times 10^{-07}$ |
| 30 | $1.00 \times 10^{-08}$ | $< 1 \times 10^{-06}$  | $6.30 \times 10^{-04}$ | $8.88 \times 10^{-06}$ |
| 31 | $2.00 \times 10^{-08}$ | $< 1 \times 10^{-06}$  | $2.39 \times 10^{-04}$ | $2.90 \times 10^{-07}$ |
| 32 | $1.10 \times 10^{-07}$ | $1.36 \times 10^{-06}$ | $3.10 \times 10^{-03}$ | $1.20 \times 10^{-04}$ |
| 33 | $6.00 \times 10^{-08}$ | $9.60 \times 10^{-07}$ | $1.27 \times 10^{-03}$ | $2.48 \times 10^{-05}$ |
| 34 | $1.40 \times 10^{-05}$ | $1.90 \times 10^{-07}$ | $4.22 \times 10^{-02}$ | $< 1 \times 10^{-06}$  |
| 35 | $2.00 \times 10^{-08}$ | $2.00 \times 10^{-08}$ | $1.76 \times 10^{-05}$ | $1.50 \times 10^{-07}$ |
| 36 | $7.00 \times 10^{-08}$ | $1.80 \times 10^{-07}$ | $9.90 \times 10^{-05}$ | $1.90 \times 10^{-07}$ |
| 37 | $< 1 \times 10^{-06}$  | $1.50 \times 10^{-07}$ | $7.26 \times 10^{-05}$ | $2.93 \times 10^{-06}$ |
| 38 | $< 1 \times 10^{-06}$  | $2.20 \times 10^{-07}$ | $1.36 \times 10^{-04}$ | $3.00 \times 10^{-07}$ |
| 39 | $7.00 \times 10^{-08}$ | $7.40 \times 10^{-07}$ | $1.45 \times 10^{-03}$ | $2.61 \times 10^{-05}$ |
| 40 | $4.00 \times 10^{-08}$ | $4.90 \times 10^{-07}$ | $6.05 \times 10^{-04}$ | $6.81 \times 10^{-06}$ |
| 41 | $7.56 \times 10^{-05}$ | $1.17 \times 10^{-03}$ | $< 1 \times 10^{-06}$  | $2.00 \times 10^{-08}$ |
| 42 | $8.00 \times 10^{-08}$ | $6.90 \times 10^{-07}$ | $3.61 \times 10^{-04}$ | $7.10 \times 10^{-07}$ |
| 43 | $1.30 \times 10^{-07}$ | $9.10 \times 10^{-07}$ | $1.92 \times 10^{-04}$ | $2.21 \times 10^{-06}$ |
| 44 | $< 1 \times 10^{-06}$  | $6.00 \times 10^{-08}$ | $9.79 \times 10^{-05}$ | $2.10 \times 10^{-07}$ |
| 45 | $5.00 \times 10^{-08}$ | $6.00 \times 10^{-08}$ | $2.23 \times 10^{-03}$ | $8.92 \times 10^{-06}$ |
| 46 | $2.70 \times 10^{-07}$ | $2.09 \times 10^{-06}$ | $3.10 \times 10^{-03}$ | $1.22 \times 10^{-04}$ |
| 47 | $2.00 \times 10^{-08}$ | $3.70 \times 10^{-07}$ | $4.24 \times 10^{-03}$ | $6.03 \times 10^{-05}$ |
| 48 | $2.27 \times 10^{-03}$ | $1.10 \times 10^{-05}$ | $< 1 \times 10^{-06}$  | $2.00 \times 10^{-08}$ |

---

1-Diethynylnaph.

---

|    |                        |                        |                        |                        |
|----|------------------------|------------------------|------------------------|------------------------|
| 0  | $1.25 \times 10^{-03}$ | $2.09 \times 10^{-06}$ | $< 1 \times 10^{-06}$  | $4.00 \times 10^{-08}$ |
| 1  | $1.00 \times 10^{-07}$ | $5.10 \times 10^{-07}$ | $5.10 \times 10^{-07}$ | $2.65 \times 10^{-05}$ |
| 2  | $2.20 \times 10^{-07}$ | $5.80 \times 10^{-07}$ | $5.80 \times 10^{-07}$ | $5.54 \times 10^{-05}$ |
| 3  | $3.00 \times 10^{-07}$ | $1.93 \times 10^{-06}$ | $1.88 \times 10^{-05}$ | $2.86 \times 10^{-05}$ |
| 4  | $4.00 \times 10^{-07}$ | $2.59 \times 10^{-06}$ | $2.74 \times 10^{-05}$ | $3.35 \times 10^{-04}$ |
| 5  | $2.20 \times 10^{-07}$ | $1.57 \times 10^{-06}$ | $2.22 \times 10^{-05}$ | $2.63 \times 10^{-04}$ |
| 6  | $4.80 \times 10^{-07}$ | $3.07 \times 10^{-06}$ | $2.14 \times 10^{-05}$ | $1.81 \times 10^{-04}$ |
| 7  | $9.80 \times 10^{-05}$ | $1.60 \times 10^{-07}$ | $< 1 \times 10^{-06}$  | $6.00 \times 10^{-08}$ |
| 8  | $2.16 \times 10^{-04}$ | $1.70 \times 10^{-07}$ | $< 1 \times 10^{-06}$  | $1.00 \times 10^{-08}$ |
| 9  | $2.00 \times 10^{-08}$ | $1.80 \times 10^{-07}$ | $1.00 \times 10^{-07}$ | $1.98 \times 10^{-06}$ |
| 10 | $< 1 \times 10^{-06}$  | $3.90 \times 10^{-07}$ | $5.20 \times 10^{-07}$ | $1.46 \times 10^{-05}$ |
| 11 | $3.30 \times 10^{-07}$ | $2.14 \times 10^{-06}$ | $8.98 \times 10^{-06}$ | $5.22 \times 10^{-05}$ |
| 12 | $3.70 \times 10^{-07}$ | $2.46 \times 10^{-06}$ | $3.14 \times 10^{-05}$ | $3.22 \times 10^{-04}$ |

|                  |                        |                        |                        |                        |
|------------------|------------------------|------------------------|------------------------|------------------------|
| 13               | $4.00 \times 10^{-07}$ | $2.62 \times 10^{-06}$ | $1.27 \times 10^{-05}$ | $2.14 \times 10^{-04}$ |
| 14               | $5.00 \times 10^{-07}$ | $4.43 \times 10^{-05}$ | $4.43 \times 10^{-05}$ | $1.85 \times 10^{-04}$ |
| 15               | $8.82 \times 10^{-05}$ | $1.00 \times 10^{-07}$ | $1.00 \times 10^{-08}$ | $1.60 \times 10^{-07}$ |
| 16               | $1.83 \times 10^{-04}$ | $1.50 \times 10^{-07}$ | $1.00 \times 10^{-08}$ | $3.20 \times 10^{-07}$ |
| 17               | $1.90 \times 10^{-07}$ | $9.70 \times 10^{-07}$ | $9.70 \times 10^{-07}$ | $1.05 \times 10^{-05}$ |
| 19               | $5.00 \times 10^{-07}$ | $3.15 \times 10^{-06}$ | $9.30 \times 10^{-07}$ | $2.59 \times 10^{-05}$ |
| 20               | $5.40 \times 10^{-07}$ | $3.40 \times 10^{-06}$ | $3.50 \times 10^{-07}$ | $1.01 \times 10^{-04}$ |
| 24               | $3.98 \times 10^{-04}$ | $1.27 \times 10^{-06}$ | $< 1 \times 10^{-06}$  | $< 1 \times 10^{-06}$  |
| 25               | $1.00 \times 10^{-07}$ | $7.30 \times 10^{-07}$ | $1.01 \times 10^{-06}$ | $9.29 \times 10^{-05}$ |
| 26               | $5.20 \times 10^{-07}$ | $3.24 \times 10^{-06}$ | $1.53 \times 10^{-06}$ | $1.42 \times 10^{-04}$ |
| 27               | $3.80 \times 10^{-07}$ | $1.45 \times 10^{-05}$ | $1.45 \times 10^{-05}$ | $2.16 \times 10^{-04}$ |
| 32               | $5.13 \times 10^{-04}$ | $2.11 \times 10^{-06}$ | $< 1 \times 10^{-06}$  | $1.70 \times 10^{-07}$ |
| 33               | $2.80 \times 10^{-07}$ | $8.03 \times 10^{-05}$ | $8.03 \times 10^{-05}$ | $2.77 \times 10^{-04}$ |
| 34               | $4.20 \times 10^{-07}$ | $1.70 \times 10^{-05}$ | $1.70 \times 10^{-05}$ | $2.32 \times 10^{-04}$ |
| 35               | $3.30 \times 10^{-07}$ | $2.13 \times 10^{-06}$ | $2.26 \times 10^{-05}$ | $2.28 \times 10^{-04}$ |
| 36               | $6.00 \times 10^{-08}$ | $4.90 \times 10^{-07}$ | $3.10 \times 10^{-07}$ | $6.00 \times 10^{-08}$ |
| 37               | $1.50 \times 10^{-07}$ | $1.08 \times 10^{-06}$ | $3.10 \times 10^{-07}$ | $5.67 \times 10^{-05}$ |
| 38               | $4.20 \times 10^{-07}$ | $2.74 \times 10^{-06}$ | $8.50 \times 10^{-07}$ | $6.59 \times 10^{-05}$ |
| 39               | $2.45 \times 10^{-04}$ | $2.90 \times 10^{-07}$ | $1.00 \times 10^{-08}$ | $5.60 \times 10^{-07}$ |
| 40               | $8.71 \times 10^{-04}$ | $5.10 \times 10^{-07}$ | $< 1 \times 10^{-06}$  | $3.00 \times 10^{-08}$ |
| 41               | $1.60 \times 10^{-07}$ | $6.37 \times 10^{-06}$ | $6.37 \times 10^{-06}$ | $1.32 \times 10^{-04}$ |
| 42               | $4.00 \times 10^{-07}$ | $2.61 \times 10^{-06}$ | $9.00 \times 10^{-07}$ | $1.15 \times 10^{-04}$ |
| 43               | $3.30 \times 10^{-07}$ | $2.12 \times 10^{-06}$ | $1.02 \times 10^{-06}$ | $1.08 \times 10^{-04}$ |
| 44               | $3.10 \times 10^{-07}$ | $2.04 \times 10^{-06}$ | $1.33 \times 10^{-06}$ | $3.90 \times 10^{-07}$ |
| 45               | $1.30 \times 10^{-07}$ | $9.30 \times 10^{-07}$ | $4.80 \times 10^{-07}$ | $7.28 \times 10^{-06}$ |
| 46               | $7.00 \times 10^{-08}$ | $5.80 \times 10^{-07}$ | $1.30 \times 10^{-07}$ | $6.52 \times 10^{-06}$ |
| 47               | $2.52 \times 10^{-05}$ | $4.00 \times 10^{-08}$ | $1.00 \times 10^{-08}$ | $2.50 \times 10^{-07}$ |
| 48               | $1.17 \times 10^{-03}$ | $3.50 \times 10^{-07}$ | $< 1 \times 10^{-06}$  | $2.00 \times 10^{-08}$ |
| 49               | $1.70 \times 10^{-07}$ | $7.00 \times 10^{-07}$ | $7.00 \times 10^{-07}$ | $3.28 \times 10^{-05}$ |
| 50               | $4.00 \times 10^{-07}$ | $2.61 \times 10^{-06}$ | $1.16 \times 10^{-06}$ | $3.89 \times 10^{-05}$ |
| 51               | $2.90 \times 10^{-07}$ | $1.88 \times 10^{-06}$ | $1.15 \times 10^{-06}$ | $1.46 \times 10^{-05}$ |
| 52               | $2.90 \times 10^{-07}$ | $1.88 \times 10^{-06}$ | $1.15 \times 10^{-06}$ | $1.46 \times 10^{-05}$ |
| 2-Diethynylnaph. |                        |                        |                        |                        |
| 8                | $8.14 \times 10^{-06}$ | $< 1 \times 10^{-06}$  | $< 1 \times 10^{-06}$  | $4.00 \times 10^{-08}$ |
| 9                | $1.00 \times 10^{-08}$ | $1.50 \times 10^{-07}$ | $3.00 \times 10^{-07}$ | $1.35 \times 10^{-06}$ |
| 11               | $3.20 \times 10^{-07}$ | $4.17 \times 10^{-04}$ | $4.17 \times 10^{-04}$ | $1.28 \times 10^{-05}$ |
| 12               | $1.00 \times 10^{-08}$ | $2.50 \times 10^{-07}$ | $1.38 \times 10^{-05}$ | $8.15 \times 10^{-05}$ |
| 32               | $1.13 \times 10^{-06}$ | $0.00 \times 10^{+00}$ | $1.00 \times 10^{-08}$ | $1.80 \times 10^{-07}$ |
| 33               | $5.00 \times 10^{-08}$ | $1.00 \times 10^{-07}$ | $8.20 \times 10^{-07}$ | $3.20 \times 10^{-07}$ |
| 35               | $1.50 \times 10^{-07}$ | $2.40 \times 10^{-06}$ | $2.40 \times 10^{-06}$ | $1.08 \times 10^{-05}$ |
| 37               | $5.00 \times 10^{-08}$ | $2.62 \times 10^{-06}$ | $2.62 \times 10^{-06}$ | $2.60 \times 10^{-05}$ |
| 40               | $6.88 \times 10^{-04}$ | $7.60 \times 10^{-07}$ | $< 1 \times 10^{-06}$  | $1.00 \times 10^{-08}$ |
| 41               | $7.00 \times 10^{-08}$ | $1.80 \times 10^{-07}$ | $8.50 \times 10^{-07}$ | $1.60 \times 10^{-06}$ |
| 42               | $7.00 \times 10^{-08}$ | $1.75 \times 10^{-06}$ | $1.75 \times 10^{-06}$ | $1.41 \times 10^{-05}$ |
| 43               | $1.80 \times 10^{-07}$ | $1.94 \times 10^{-06}$ | $1.94 \times 10^{-06}$ | $1.82 \times 10^{-06}$ |
